# Supplementary material
Source: PubMed Central journal article supplement (PMC3866693)
Supplement: NIHMS536716-supplement-1_si_001.pdf [file NIHMS536716-supplement-1_si_001.pdf]

## Supporting Information

### **Synthesis and Evaluation in Monkey of [<sup>18</sup>F]4-Fluoro-*N*-methyl-*N*-(4-(6-(methylamino)pyrimidin-4-yl)thiazol-2-yl)benzamide ([<sup>18</sup>F]FIMX), a Promising Radioligand for PET Imaging of Brain Metabotropic Glutamate Receptor 1 (mGluR1)**

Rong Xu, Paolo Zanotti-Fregonara, Sami S. Zoghbi, Robert L. Gladding, Alicia Woock, Robert B. Innis, and Victor W Pike\*

#### **Table of Contents**

|                                                                                         |    |
|-----------------------------------------------------------------------------------------|----|
| 1. HPLC chromatogram from the analysis of <b>11</b>                                     | S2 |
| 2. HPLC chromatograms from the analysis of [ <sup>18</sup> F] <b>11</b>                 | S3 |
| 3. A typical chromatogram from the HPLC purification of [ <sup>18</sup> F] <b>11</b>    | S4 |
| 4. Temperature time-courses for different reaction solvents under microwave irradiation | S5 |

1. HPLC chromatogram from the analysis of 11

HPLC Method: 30% B (MeCN), 70% A (0.1%TFA), 2 ml/min, 15 min, at 230nm  
HPLC column: Phenomenex Luna, 250 mm x4.6 mm, 10 micron.  
Back pressure 1.8 kpsi

UV at 230 nm

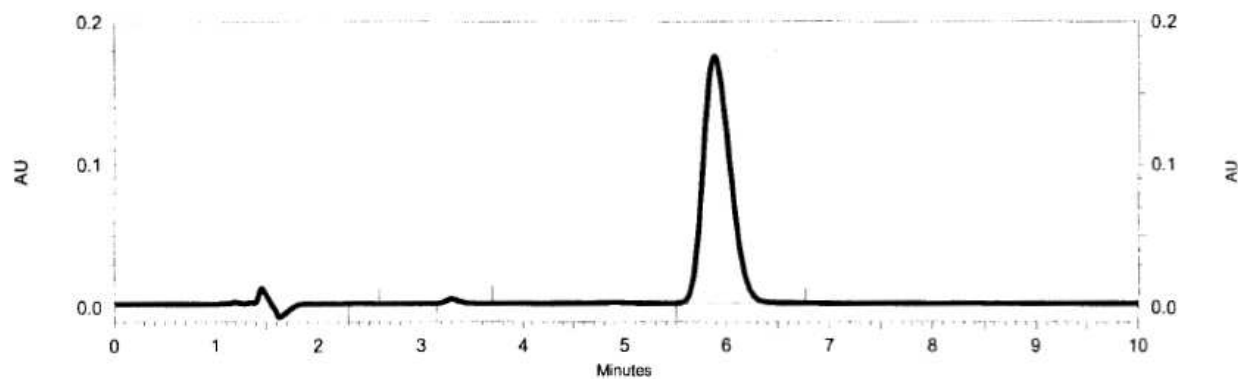

Bioscan Results

| Retention Time | Area | Area Percent |
|----------------|------|--------------|
|----------------|------|--------------|

Det 166 Results

| Retention Time | Area    | Area Percent |
|----------------|---------|--------------|
| 2.392          | 3068    | 0.096        |
| 3.300          | 30507   | 0.954        |
| 5.875          | 3163954 | 98.950       |

## 2. HPLC chromatograms from the analysis of [<sup>18</sup>F]11

HPLC Method: 30% B (MeCN), 70% A (0.1%TFA), 2 ml/min, 15 min, at 230nm  
 Phenomenex Luna, 250 mm x4.6 mm, 10 micron.  
 Back pressure 1.8 kpsi

### Bioscan Radioactivity

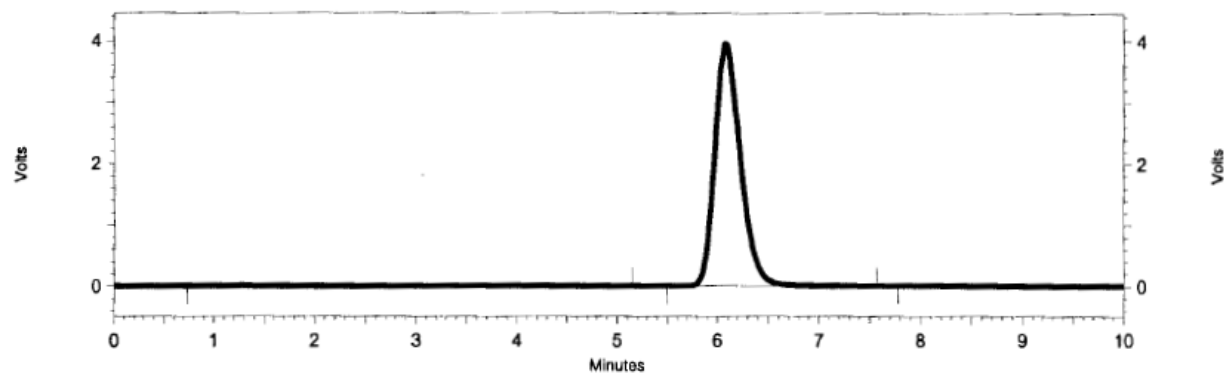

### UV at 230 nm

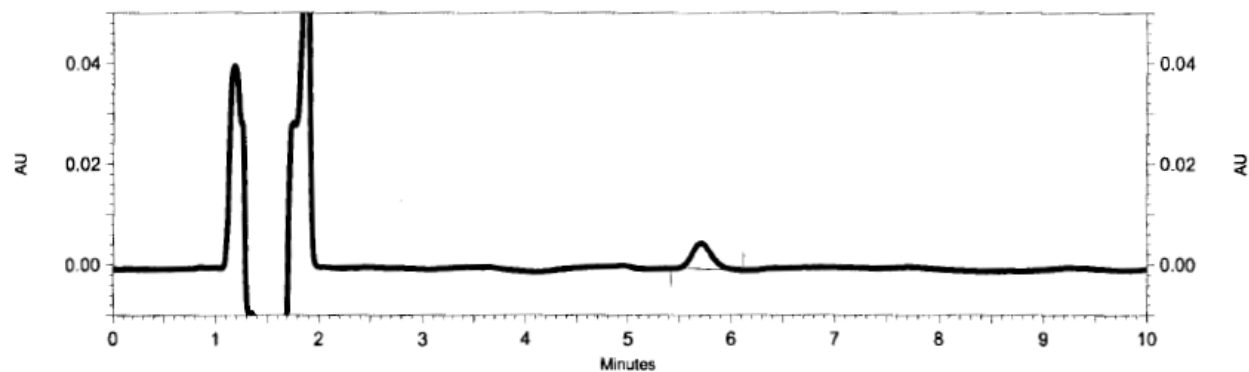

### Bioscan Results

| Retention Time | Area     | Area Percent |
|----------------|----------|--------------|
| 1.267          | 90096    | 0.129        |
| 6.073          | 69593980 | 99.777       |
| 7.911          | 65396    | 0.094        |

### Det 166 Results

| Retention Time | Area  | Area Percent |
|----------------|-------|--------------|
| 5.708          | 69641 | 100.000      |

3. A typical chromatogram from the HPLC purification of [ $^{18}\text{F}$ ]11.

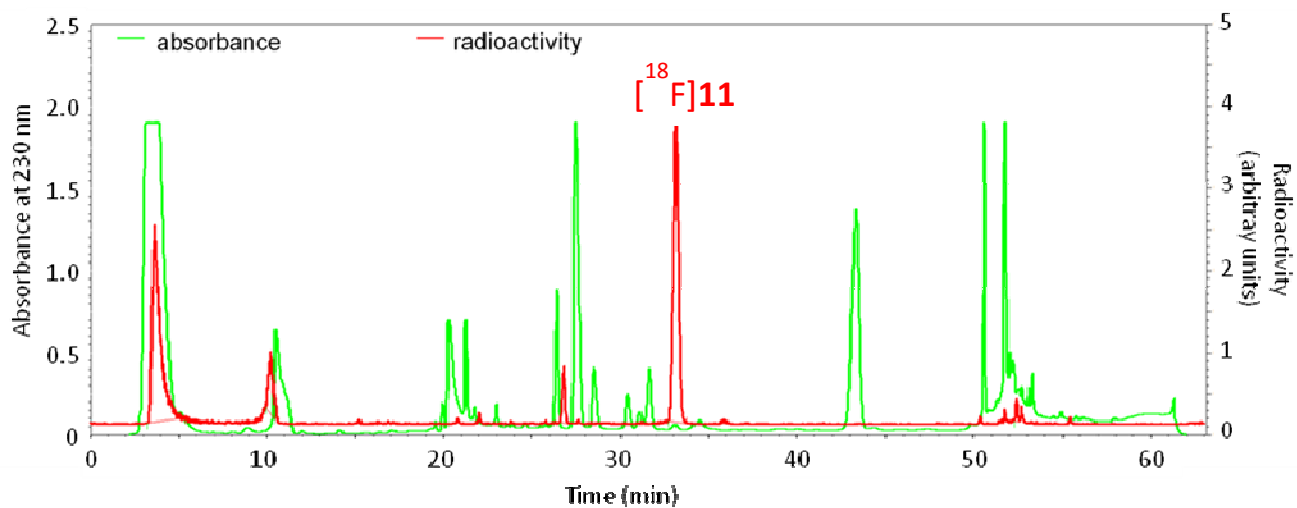

4. Temperature time-courses for different reaction solvents under microwave irradiation.

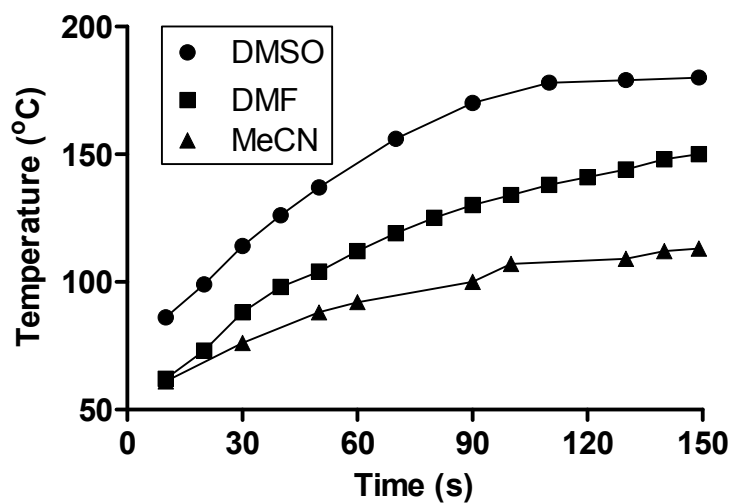

The initial solvent volume was 0.6 m, and microwave power was 90 W. Temperature was read from the microwave apparatus from its integral infrared sensor.
